# Supplementary material for: Barrett’s Epithelium to Esophageal Adenocarcinoma: Is There a “Point of No Return”?
Source: Front Genet. 2021 Sep 17;12:706706. doi: 10.3389/fgene.2021.706706 (PMC8485939; doi:10.3389/fgene.2021.706706)
Supplement: Supplementary Table 1 — Total FFKM read count data for the four time points of the BEC model (0, 20, 40, and 60 W). [file Table_1.XLSX]

## Sheet: stab1
Symbol	BEC0W	BEC20W	BEC40W	BEC60W
_A1BG	0	0	0	2
_A1BG-AS1	0	0	0	3
_A1CF	0	0	0	0
_A2M	0	0	2	0
_A2ML1	706	870	3096	1271
_A4GALT	88	73	110	38
_A4GNT	0	0	0	0
_AAAS	43	103	54	62
_AACS	289	233	493	432
_AACSP1	1	0	0	0
_AADAC	0	0	0	0
_AADACL2	0	0	0	0
_AADACL3	0	0	0	0
_AADACL4	0	0	0	0
_AADAT	39	171	196	170
_AAGAB	772	1745	1060	1105
_AAK1	55	130	101	72
_AAMP	602	1309	1426	1167
_AANAT	0	0	0	0
_AARS	813	3039	2755	1270
_AARS2	17	53	39	66
_AARSD1	288	872	418	266
_AASDH	52	286	133	177
_AASDHPPT	540	1832	1544	1420
_AASS	184	277	291	337
_AATF	211	525	372	209
_AATK	6	0	27	6
_ABAT	15	1	16	22
_ABCA1	300	216	344	118
_ABCA10	46	241	36	14
_ABCA11P	55	207	295	180
_ABCA12	121	376	301	230
_ABCA13	34	72	54	60
_ABCA17P	2	0	0	0
_ABCA2	40	33	9	21
_ABCA3	0	0	0	0
_ABCA4	0	0	0	0
_ABCA5	334	756	993	837
_ABCA6	0	9	34	0
_ABCA7	41	45	27	78
_ABCA8	0	0	0	0
_ABCA9	19	0	2	0
_ABCB1	0	0	0	0
_ABCB10	109	411	369	364
_ABCB11	2	14	1	2
_ABCB4	0	0	0	5
_ABCB5	0	0	0	0
_ABCB6	81	105	52	49
_ABCB7	409	842	947	701
_ABCB8	60	57	31	114
_ABCB9	34	56	51	87
_ABCC1	76	112	134	76
_ABCC10	29	45	109	73
_ABCC11	0	6	1	3
_ABCC12	0	0	0	0
_ABCC13	0	0	0	0
_ABCC2	3	18	31	10
_ABCC3	147	344	54	3
_ABCC4	55	484	276	269
_ABCC5	194	252	280	243
_ABCC6	0	5	5	21
_ABCC6P1	0	0	0	8
_ABCC6P2	0	1	31	11
_ABCC8	0	0	0	0
_ABCC9	279	489	328	401
_ABCD1	3	0	6	0
_ABCD2	0	0	3	1
_ABCD3	311	882	590	509
_ABCD4	103	126	126	87
_ABCE1	1690	6693	2990	2474
_ABCF1	562	607	589	407
_ABCF2	232	989	700	445
_ABCF3	1066	1525	1763	1467
_ABCG1	32	45	93	7
_ABCG2	41	122	61	50
_ABCG4	0	0	0	1
_ABCG5	0	0	0	0
_ABCG8	0	0	0	0
_ABHD1	2	19	4	2
_ABHD10	52	630	188	184
_ABHD11	25	30	6	4
_ABHD12	48	226	199	109
_ABHD12B	0	0	0	5
_ABHD13	91	263	379	248
_ABHD14A	5	5	15	4
_ABHD14A-ACY1	13	33	51	59
_ABHD14B	204	318	307	155
_ABHD15	14	14	66	49
_ABHD16A	15	30	77	81
_ABHD16B	9	9	22	15
_ABHD2	443	536	469	330
_ABHD3	69	260	416	91
_ABHD4	33	80	353	136
_ABHD5	271	696	1530	362
_ABHD6	16	43	25	33
_ABHD8	6	0	20	26
_ABI1	952	1368	2913	2249
_ABI2	241	370	250	145
_ABI3	0	0	0	0
_ABI3BP	43	34	49	9
_ABL1	118	136	152	97
_ABL2	784	1414	1737	633
_ABLIM1	300	1126	522	229
_ABLIM2	19	0	0	0
_ABLIM3	1154	1329	796	668
_ABO	8	7	6	6
_ABR	678	867	706	646
_ABRA	0	1	0	0
_ABT1	57	75	81	57
_ABTB1	117	80	233	132
_ABTB2	29	31	56	48
_ACAA1	492	1343	802	720
_ACAA2	213	337	338	297
_ACACA	376	1061	941	799
_ACACB	16	17	16	9
_ACAD10	95	148	203	184
_ACAD11	70	331	227	226
_ACAD8	61	114	110	20
_ACAD9	170	240	256	300
_ACADL	0	0	13	17
_ACADM	664	2022	1786	1313
_ACADS	0	7	10	11
_ACADSB	67	221	166	170
_ACADVL	1592	3342	3080	3367
_ACAN	0	0	0	0
_ACAP1	16	8	26	10
_ACAP2	815	1827	1553	1250
_ACAP3	98	154	239	167
_ACAT1	859	3685	3398	3772
_ACAT2	286	801	387	601
_ACBD3	322	583	809	535
_ACBD4	0	24	28	23
_ACBD5	247	868	708	823
_ACBD6	284	740	581	442
_ACBD7	1	0	9	63
_ACCS	5	8	45	19
_ACCSL	0	0	0	0
_ACD	32	27	58	29
_ACE	0	13	21	0
_ACE2	8	10	13	1
_ACER1	0	0	0	0
_ACER2	6	16	16	5
_ACER3	201	890	593	578
_ACHE	0	0	0	0
_ACIN1	407	661	851	648
_ACLY	1667	3329	2369	2804
_ACMSD	0	10	3	8
_ACN9	48	266	103	118
_ACO1	287	611	320	399
_ACO2	113	200	168	157
_ACOT1	0	0	16	36
_ACOT11	17	28	32	31
_ACOT12	0	0	0	0
_ACOT13	835	2305	1218	881
_ACOT2	20	0	37	26
_ACOT4	9	0	4	8
_ACOT6	0	0	0	0
_ACOT7	77	175	37	57
_ACOT8	165	84	224	260
_ACOT9	635	1161	1246	1086
_ACOX1	822	1493	1912	1853
_ACOX2	4	6	0	0
_ACOX3	41	12	41	43
_ACOXL	0	40	0	0
_ACP1	1318	3969	3570	2945
_ACP2	7	55	53	93
_ACP5	12	32	28	4
_ACP6	3	48	44	41
_ACPL2	141	201	474	207
_ACPP	0	0	5	0
_ACPT	0	0	0	0
_ACR	0	0	0	0
_ACRBP	0	0	5	0
_ACRC	0	37	26	16
_ACRV1	6	12	7	0
_ACSBG1	29	150	81	56
_ACSBG2	0	0	0	0
_ACSF2	485	364	2307	1531
_ACSF3	32	14	63	103
_ACSL1	375	973	1061	570
_ACSL3	3489	7034	8419	5180
_ACSL4	952	2310	2003	1742
_ACSL5	642	2153	696	488
_ACSL6	8	0	5	16
_ACSM1	1	0	0	0
_ACSM2A	0	0	0	0
_ACSM2B	0	0	0	0
_ACSM3	0	31	86	23
_ACSM4	0	0	0	0
_ACSM5	0	0	0	0
_ACSS1	9	12	0	5
_ACSS2	246	221	215	375
_ACSS3	0	0	0	0
_ACTA1	0	0	0	0
_ACTA2	11	38	28	27
_ACTB	15661	13512	10935	8560
_ACTBL2	2	0	3	14
_ACTC1	0	0	0	0
_ACTG1	10969	14355	45598	29846
_ACTG2	0	0	0	0
_ACTL6A	497	2412	1474	1481
_ACTL6B	0	0	0	0
_ACTL7A	0	0	0	0
_ACTL7B	0	0	0	0
_ACTL8	0	0	0	0
_ACTL9	0	0	0	0
_ACTN1	1543	2306	3091	2498
_ACTN2	0	0	0	0
_ACTN3	0	0	0	0
_ACTN4	597	627	2163	1715
_ACTR10	515	1417	1619	1468
_ACTR1A	639	993	1218	1162
_ACTR1B	81	273	147	270
_ACTR2	1706	5815	3539	3790
_ACTR3	2178	6034	6285	5168
_ACTR3B	9	39	40	24
_ACTR3BP2	0	0	0	0
_ACTR3C	12	24	47	54
_ACTR5	44	39	85	36
_ACTR6	188	675	638	541
_ACTR8	184	772	772	697
_ACTRT1	0	0	0	0
_ACTRT2	0	0	0	0
_ACVR1	93	166	144	54
_ACVR1B	24	97	182	96
_ACVR1C	0	4	0	0
_ACVR2A	125	272	284	184
_ACVR2B	6	30	17	7
_ACVRL1	0	0	0	0
_ACY1	28	65	91	112
_ACY3	0	4	0	0
_ACYP1	25	41	41	40
_ACYP2	20	44	87	68
_ADA	409	565	566	230
_ADAD1	0	0	0	0
_ADAD2	0	0	2	1
_ADAL	95	326	169	144
_ADAM10	2524	4021	5412	4510
_ADAM11	0	0	0	0
_ADAM12	0	0	0	0
_ADAM15	384	1114	995	721
_ADAM17	66	367	241	169
_ADAM18	0	0	0	0
_ADAM19	626	662	197	220
_ADAM2	0	0	0	0
_ADAM20	0	7	4	0
_ADAM21	0	3	6	0
_ADAM21P1	0	0	0	0
_ADAM22	0	9	138	174
_ADAM23	0	0	0	0
_ADAM28	373	259	344	91
_ADAM29	0	0	0	0
_ADAM30	0	0	0	2
_ADAM32	8	26	182	63
_ADAM33	0	0	0	0
_ADAM3A	0	0	0	0
_ADAM6	0	0	0	0
_ADAM7	0	0	0	0
_ADAM8	47	60	0	0
_ADAM9	7585	11665	18703	10852
_ADAMDEC1	0	0	0	0
_ADAMTS1	0	4	3	0
_ADAMTS10	1	0	0	0
_ADAMTS12	33	90	15	42
_ADAMTS13	4	1	1	3
_ADAMTS14	0	3	0	0
_ADAMTS15	87	26	165	43
_ADAMTS16	14	12	0	0
_ADAMTS17	0	0	0	0
_ADAMTS18	0	0	0	0
_ADAMTS19	0	0	0	0
_ADAMTS2	0	0	0	0
_ADAMTS20	0	8	5	0
_ADAMTS3	1	3	0	0
_ADAMTS4	0	0	0	0
_ADAMTS5	0	0	0	0
_ADAMTS6	204	269	216	371
_ADAMTS7	56	36	38	31
_ADAMTS8	0	0	0	0
_ADAMTS9	101	115	5	5
_ADAMTSL1	0	0	0	0
_ADAMTSL2	0	0	0	0
_ADAMTSL3	0	0	0	0
_ADAMTSL4	23	5	132	121
_ADAMTSL5	48	29	97	43
_ADAP1	0	35	66	6
_ADAP2	0	0	0	12
_ADAR	910	1745	1483	1241
_ADARB1	15	66	23	33
_ADARB2	0	0	0	0
_ADAT1	21	127	75	58
_ADAT2	54	167	98	85
_ADAT3	3	3	0	2
_ADC	14	36	15	16
_ADCK1	0	8	18	1
_ADCK2	3	46	59	33
_ADCK3	47	39	63	82
_ADCK4	3	16	66	71
_ADCK5	6	13	7	5
_ADCY1	0	0	0	0
_ADCY10	0	0	1	0
_ADCY2	0	0	0	0
_ADCY3	198	483	400	325
_ADCY4	10	0	2	9
_ADCY5	0	0	0	0
_ADCY6	102	189	241	240
_ADCY7	50	194	157	114
_ADCY8	0	0	0	0
_ADCY9	75	76	217	130
_ADCYAP1	0	0	0	0
_ADCYAP1R1	0	0	0	0
_ADD1	649	1168	1731	1684
_ADD2	0	0	0	0
_ADD3	1626	3196	4705	3445
_ADH1A	0	0	0	3
_ADH1B	0	0	0	0
_ADH1C	0	0	0	0
_ADH4	0	0	0	0
_ADH5	1112	2264	2483	1676
_ADH6	14	8	12	17
_ADH7	0	0	0	0
_ADHFE1	0	13	4	5
_ADI1	122	304	329	375
_ADIG	0	0	0	0
_ADIPOQ	0	0	0	0
_ADIPOR1	135	331	492	399
_ADIPOR2	249	442	533	388
_ADK	557	1542	1657	1290
_ADM	472	350	4136	1533
_ADM2	0	12	10	2
_ADNP	568	1048	996	973
_ADNP2	108	261	199	149
_ADO	38	73	53	58
_ADORA1	0	0	0	0
_ADORA2A	0	0	0	0
_ADORA2B	58	172	70	52
_ADORA3	0	0	0	0
_ADPGK	265	429	385	414
_ADPRH	0	4	10	4
_ADPRHL1	6	7	8	7
_ADPRHL2	23	35	77	27
_ADRA1A	0	0	0	0
_ADRA1B	4	15	10	2
_ADRA1D	0	0	0	0
_ADRA2A	0	0	0	0
_ADRA2B	0	0	0	0
_ADRA2C	0	0	0	0
_ADRB1	1	0	1	0
_ADRB2	89	89	280	105
_ADRB3	0	0	0	0
_ADRBK1	99	220	573	291
_ADRBK2	89	124	170	59
_ADRM1	376	1009	1145	730
_ADSL	693	2427	1589	1167
_ADSS	998	2582	1875	1305
_ADSSL1	15	3	45	0
_AEBP1	0	0	0	0
_AEBP2	149	366	344	240
_AEN	127	464	176	282
_AES	4140	5151	8154	5106
_AFAP1	308	203	398	215
_AFAP1L1	24	58	37	50
_AFAP1L2	442	411	1186	996
_AFF1	340	509	1181	749
_AFF2	0	0	0	0
_AFF3	0	0	0	0
_AFF4	845	1276	1593	1264
_AFG3L1P	101	235	249	168
_AFG3L2	569	1377	1006	807
_AFM	0	0	0	0
_AFMID	79	114	93	150
_AFP	0	0	0	0
_AFTPH	361	697	865	698
_AGA	358	647	512	378
_AGAP1	52	173	151	78
_AGAP11	1	2	13	2
_AGAP2	0	9	48	50
_AGAP3	270	314	608	492
_AGAP4	45	50	29	105
_AGAP5	41	52	52	53
_AGAP6	34	42	56	82
_AGAP7	20	35	34	58
_AGAP8	80	168	152	191
_AGAP9	34	35	30	30
_AGBL1	6	0	0	0
_AGBL2	0	0	6	1
_AGBL3	2	4	10	5
_AGBL4	0	0	0	0
_AGBL5	607	939	1320	888
_AGER	12	27	38	19
_AGFG1	294	809	856	459
_AGFG2	6	32	68	32
_AGGF1	486	849	841	846
_AGK	186	503	291	258
_AGL	226	486	373	461
_AGMAT	5	20	26	36
_AGPAT1	65	89	160	72
_AGPAT2	5	15	28	20
_AGPAT3	428	762	741	640
_AGPAT4	116	143	229	123
_AGPAT5	533	2581	1376	1318
_AGPAT6	479	1100	804	854
_AGPAT9	342	1938	334	143
_AGPS	681	1495	1109	947
_AGR2	95	2963	284	89
_AGR3	0	0	0	0
_AGRN	385	261	434	491
_AGRP	0	0	0	2
_AGT	0	0	0	0
_AGTPBP1	279	755	1400	1056
_AGTR1	0	0	0	0
_AGTR2	0	0	0	0
_AGTRAP	160	350	306	257
_AGXT	0	0	0	0
_AGXT2	0	0	0	0
_AHCTF1	1112	3192	2200	2044
_AHCY	944	2744	3120	2173
_AHCYL1	625	1323	1159	929
_AHCYL2	153	586	705	356
_AHDC1	10	12	28	14
_AHI1	160	471	598	321
_AHNAK	7676	11676	16205	18750
_AHNAK2	4313	2669	4503	2823
_AHR	126	319	220	113
_AHRR	28	48	106	64
_AHSA1	487	2546	2417	1199
_AHSA2	428	814	1594	858
_AHSG	0	0	0	0
_AHSP	0	0	0	0
_AICDA	0	0	2	0
_AIDA	788	1861	1590	1691
_AIF1	0	0	0	0
_AIF1L	22	22	17	5
_AIFM1	303	795	376	333
_AIFM2	11	26	34	35
_AIFM3	0	8	14	6
_AIG1	514	843	1451	522
_AIM1	652	1534	1127	712
_AIM1L	33	10	119	25
_AIM2	25	96	51	12
_AIMP1	416	1742	1018	680
_AIMP2	441	2077	504	362
_AIP	71	106	410	296
_AIPL1	0	0	0	0
_AIRE	0	0	0	0
_AJAP1	0	0	0	0
_AK1	119	152	177	229
_AK2	887	2530	2076	1426
_AK3	179	402	357	284
_AK4	492	1099	978	797
_AK5	9	47	0	4
_AK7	0	6	8	10
_AK8	0	0	0	1
_AKAP1	158	459	353	297
_AKAP10	282	484	531	420
_AKAP11	607	1369	1030	1017
_AKAP12	5759	4852	18597	15048
_AKAP13	432	714	1190	806
_AKAP14	0	0	0	0
_AKAP17A	94	130	80	22
_AKAP2	966	1147	1065	821
_AKAP3	0	4	4	4
_AKAP4	0	0	0	0
_AKAP5	0	18	41	37
_AKAP6	56	56	55	27
_AKAP7	54	143	104	156
_AKAP8	174	278	245	139
_AKAP8L	144	190	273	136
_AKAP9	2556	3837	5389	5308
_AKIRIN1	808	1835	2089	1278
_AKIRIN2	43	50	96	34
_AKNA	0	10	8	0
_AKNAD1	0	7	0	14
_AKR1A1	234	543	420	416
_AKR1B1	1265	4418	1618	1053
_AKR1B10	21	57	55	0
_AKR1B15	2	13	27	0
_AKR1C1	242	2751	1473	77
_AKR1C2	462	3812	1936	109
_AKR1C3	197	1313	817	103
_AKR1C4	7	60	33	0
_AKR1CL1	1	7	15	0
_AKR1D1	0	0	0	0
_AKR1E2	38	32	51	43
_AKR7A2	18	107	95	91
_AKR7A2P1	17	40	17	22
_AKR7A3	0	6	0	3
_AKR7L	0	12	7	0
_AKT1	811	1832	1461	1466
_AKT1S1	88	163	551	215
_AKT2	212	448	789	794
_AKT3	265	334	819	1411
_AKTIP	193	275	687	473
_ALAD	30	13	44	16
_ALAS1	147	442	393	260
_ALAS2	0	0	0	0
_ALB	0	0	0	0
_ALCAM	4877	9232	14103	7271
_ALDH16A1	58	50	86	123
_ALDH18A1	213	563	353	500
_ALDH1A1	0	19	4	3
_ALDH1A2	9	0	1	4
_ALDH1A3	1657	2542	3517	2262
_ALDH1B1	96	225	184	131
_ALDH1L1	3	16	11	7
_ALDH1L2	18	60	43	117
_ALDH2	72	150	57	68
_ALDH3A1	67	101	2	0
_ALDH3A2	537	1942	1456	533
_ALDH3B1	81	97	237	56
_ALDH3B2	0	1	0	0
_ALDH4A1	4	28	50	38
_ALDH5A1	14	26	137	149
_ALDH6A1	47	49	101	80
_ALDH7A1	1969	3158	4683	3872
_ALDH8A1	0	2	0	1
_ALDH9A1	231	548	481	475
_ALDOA	4735	7625	9218	8028
_ALDOB	0	0	0	0
_ALDOC	74	60	100	233
_ALG1	115	243	275	138
_ALG10	47	71	30	63
_ALG10B	33	83	43	52
_ALG11	102	370	355	259
_ALG12	28	64	60	61
_ALG13	115	239	249	188
_ALG14	17	92	61	114
_ALG1L	4	26	26	10
_ALG1L2	0	0	0	0
_ALG2	127	556	679	295
_ALG3	11	51	44	27
_ALG5	268	1500	1150	849
_ALG6	90	434	170	154
_ALG8	218	1305	655	625
_ALG9	83	258	540	411
_ALK	0	15	8	2
_ALKBH1	99	122	189	104
_ALKBH2	277	552	660	350
_ALKBH3	251	639	557	463
_ALKBH4	3	14	27	17
_ALKBH5	207	480	642	457
_ALKBH6	0	31	66	140
_ALKBH7	0	21	29	24
_ALKBH8	264	749	845	593
_ALLC	0	0	0	0
_ALMS1	321	627	323	471
_ALMS1P	0	8	4	6
_ALOX12	0	2	6	0
_ALOX12B	0	0	0	0
_ALOX12P2	4	10	2	0
_ALOX15	0	0	2	0
_ALOX15B	30	15	9	19
_ALOX5	6	9	0	0
_ALOX5AP	28	96	28	29
_ALOXE3	0	2	4	0
_ALPI	0	0	0	0
_ALPK1	109	190	340	251
_ALPK2	2	27	21	31
_ALPK3	1	2	3	0
_ALPL	0	0	0	0
_ALPP	2	0	48	1
_ALPPL2	0	0	9	1
_ALS2	174	507	476	488
_ALS2CL	410	361	731	606
_ALS2CR11	3	0	0	0
_ALS2CR12	11	6	22	46
_ALX1	7	10	8	24
_ALX3	0	2	1	6
_ALX4	0	0	4	0
_AMACR	231	338	251	199
_AMBN	0	0	0	0
_AMBP	0	0	0	1
_AMBRA1	29	45	104	53
_AMD1	660	2349	1303	798
_AMDHD1	0	4	0	35
_AMDHD2	17	51	46	30
_AMELX	0	0	0	0
_AMELY	0	0	0	0
_AMFR	433	987	1930	1260
_AMH	0	0	5	1
_AMHR2	0	0	0	0
_AMICA1	0	0	1	0
_AMIGO1	1	1	15	11
_AMIGO2	4638	7323	4535	6928
_AMIGO3	6	60	50	36
_AMMECR1	105	221	184	187
_AMMECR1L	116	203	284	179
_AMN	25	38	36	47
_AMN1	122	472	99	58
_AMOT	0	0	0	0
_AMOTL1	1145	1348	3486	2238
_AMOTL2	453	385	1249	660
_AMPD1	0	0	1	0
_AMPD2	55	68	58	63
_AMPD3	101	100	242	64
_AMPH	0	0	0	0
_AMT	22	35	27	45
_AMTN	42	17	43	0
_AMY1A	0	0	0	0
_AMY1B	0	0	0	0
_AMY1C	0	0	0	0
_AMY2A	0	0	0	0
_AMY2B	15	13	41	16
_AMZ1	0	6	18	11
_AMZ2	1075	2561	2326	1530
_AMZ2P1	12	34	19	22
_ANAPC1	515	1888	1033	1068
_ANAPC10	88	291	212	218
_ANAPC11	1374	1858	2161	2028
_ANAPC13	1522	3899	2296	1983
_ANAPC16	100	267	297	204
_ANAPC2	5	9	18	35
_ANAPC4	102	516	437	380
_ANAPC5	1578	4106	3187	3226
_ANAPC7	308	1088	741	763
_ANG	3	12	47	44
_ANGEL1	18	42	36	46
_ANGEL2	180	367	260	350
_ANGPT1	27	34	668	40
_ANGPT2	24	62	4	50
_ANGPT4	0	2	0	0
_ANGPTL1	0	37	76	75
_ANGPTL2	0	0	0	0
_ANGPTL3	6	15	0	22
_ANGPTL4	517	709	131	1244
_ANGPTL5	2	0	1	0
_ANGPTL6	12	6	10	0
_ANGPTL7	0	26	36	0
_ANK1	0	2	0	0
_ANK2	4	3	0	2
_ANK3	337	492	961	575
_ANKAR	24	43	140	63
_ANKDD1A	0	29	27	58
_ANKFN1	0	0	0	3
_ANKFY1	136	198	105	177
_ANKH	62	71	92	82
_ANKHD1	804	1123	1585	1252
_ANKHD1-EIF4EBP3	425	650	844	672
_ANKIB1	951	1910	2391	1739
_ANKK1	10	6	26	8
_ANKLE1	0	0	0	6
_ANKLE2	2767	3309	7088	5090
_ANKMY1	9	31	44	15
_ANKMY2	362	753	669	530
_ANKRA2	71	180	323	218
_ANKRD1	38	52	113	231
_ANKRD10	435	469	649	354
_ANKRD11	355	391	437	434
_ANKRD12	1318	1409	2847	2115
_ANKRD13A	1106	1775	2673	2347
_ANKRD13B	15	79	61	19
_ANKRD13C	126	354	436	304
_ANKRD13D	29	175	261	223
_ANKRD16	12	59	103	114
_ANKRD17	1083	1528	1729	1372
_ANKRD18A	163	295	208	263
_ANKRD2	8	0	11	11
_ANKRD20A1	5	9	6	13
_ANKRD20A2	5	11	16	13
_ANKRD20A3	5	11	19	19
_ANKRD20A4	5	13	6	10
_ANKRD20A8P	1	3	6	5
_ANKRD22	0	7	0	0
_ANKRD23	0	6	5	6
_ANKRD24	0	0	0	0
_ANKRD26	295	648	488	474
_ANKRD26P1	0	0	0	0
_ANKRD27	369	982	1837	1727
_ANKRD28	545	1281	728	701
_ANKRD29	7	7	46	5
_ANKRD30A	1	0	0	0
_ANKRD30B	0	0	0	0
_ANKRD30BL	1	14	3	38
_ANKRD30BP2	23	32	21	13
_ANKRD31	0	21	7	0
_ANKRD32	259	707	241	309
_ANKRD33	0	0	0	0
_ANKRD33B	0	4	2	0
_ANKRD34A	5	2	6	0
_ANKRD34B	0	0	10	0
_ANKRD34C	0	0	0	0
_ANKRD35	0	2	0	0
_ANKRD36	552	682	873	1191
_ANKRD36B	367	560	643	831
_ANKRD36BP1	35	105	121	97
_ANKRD36BP2	0	2	3	1
_ANKRD37	260	336	872	843
_ANKRD39	4	13	8	8
_ANKRD40	199	460	422	422
_ANKRD42	56	114	104	20
_ANKRD44	47	31	15	38
_ANKRD45	0	0	0	0
_ANKRD46	153	218	213	165
_ANKRD49	267	638	1384	906
_ANKRD50	521	1692	1077	975
_ANKRD52	97	161	65	90
_ANKRD53	0	0	0	12
_ANKRD54	58	81	97	65
_ANKRD55	0	0	0	0
_ANKRD6	3	10	16	128
_ANKRD7	0	0	0	0
_ANKRD9	15	19	65	49
_ANKS1A	68	77	108	65
_ANKS1B	25	17	38	29
_ANKS3	33	98	106	74
_ANKS4B	0	0	7	0
_ANKS6	272	540	347	372
_ANKZF1	840	981	1550	1186
_ANLN	2294	5446	1807	4235
_ANO1	379	658	326	98
_ANO10	377	656	961	808
_ANO2	0	0	0	0
_ANO3	0	0	10	5
_ANO4	2	4	0	0
_ANO5	0	0	0	2
_ANO6	517	975	1311	1349
_ANO7	0	0	6	4
_ANO8	7	5	19	16
_ANO9	30	31	114	84
_ANP32A	1384	2897	1966	1359
_ANP32B	1360	1818	1658	970
_ANP32C	0	0	1	0
_ANP32D	0	0	0	0
_ANP32E	2838	5789	3217	3538
_ANPEP	0	0	0	0
_ANTXR1	161	174	262	215
_ANTXR2	820	1337	394	213
_ANTXRL	0	0	0	0
_ANXA1	5681	19778	15401	11515
_ANXA10	207	314	16	2
_ANXA11	365	891	1576	803
_ANXA13	0	2	0	0
_ANXA2	56838	97624	119188	94755
_ANXA2P1	74	84	142	74
_ANXA2P2	4932	9532	11186	8652
_ANXA2P3	0	0	0	2
_ANXA3	3221	9740	12971	9768
_ANXA4	484	637	1194	774
_ANXA5	3302	6098	5376	4160
_ANXA6	1161	2570	368	290
_ANXA7	812	2474	1448	1587
_ANXA8	11295	10507	29634	25383
_ANXA8L1	8896	8610	24130	20321
_ANXA8L2	9736	9455	26984	23330
_ANXA9	0	3	11	15
_AOAH	0	0	0	0
_AOC2	0	3	0	0
_AOC3	0	0	2	0
_AOX1	505	878	384	107
_AOX2P	0	0	0	0
_AP1AR	392	1075	780	548
_AP1B1	457	789	673	713
_AP1G1	855	2092	2111	2055
_AP1G2	275	531	959	655
_AP1M1	87	143	195	128
_AP1M2	125	245	231	494
_AP1S1	145	441	238	225
_AP1S2	52	127	215	117
_AP1S3	278	1645	919	467
_AP2A1	672	667	1611	1913
_AP2A2	303	710	980	947
_AP2B1	6040	12585	12494	11450
_AP2M1	1573	2178	2316	2208
_AP2S1	505	1130	1189	1008
_AP3B1	1400	2073	2655	2322
_AP3B2	0	0	0	0
_AP3D1	679	1121	1281	1308
_AP3M1	228	659	627	494
_AP3M2	132	246	240	183
_AP3S1	744	1434	1700	1279
_AP3S2	424	865	848	657
_AP4B1	255	539	541	301
_AP4E1	221	350	344	314
_AP4M1	107	85	200	159
_AP4S1	419	612	911	616
_APAF1	268	619	490	831
_APBA1	0	0	0	1
_APBA2	0	0	0	0
_APBA3	0	11	9	15
_APBB1	7	4	106	142
_APBB1IP	0	6	0	0
_APBB2	1861	2293	2311	1856
_APBB3	40	30	68	26
_APC	937	2000	2202	1882
_APC2	3	1	2	3
_APCDD1	0	0	0	0
_APCDD1L	4	2	0	1
_APCS	2	0	0	6
_APEH	258	432	398	470
_APEX1	1714	3762	4155	2411
_APEX2	21	46	23	21
_APH1A	306	584	811	700
_APH1B	31	56	80	88
_API5	670	2012	1700	1339
_APIP	29	291	169	158
_APITD1	704	2073	831	1322
_APITD1-CORT	346	973	393	601
_APLF	148	305	242	251
_APLN	0	0	0	4
_APLNR	0	0	0	0
_APLP1	13	3	32	31
_APLP2	16134	18840	14630	12011
_APOA1	0	0	0	0
_APOA1BP	157	477	368	510
_APOA2	0	0	0	0
_APOA4	0	0	0	0
_APOA5	0	0	0	0
_APOB	0	0	4	0
_APOBEC1	0	0	0	0
_APOBEC2	0	0	0	0
_APOBEC3A	0	3	1	0
_APOBEC3B	18	37	10	12
_APOBEC3C	73	224	143	154
_APOBEC3D	5	56	50	39
_APOBEC3F	12	34	24	12
_APOBEC3G	58	107	99	59
_APOBEC3H	0	0	0	0
_APOBEC4	5	9	0	0
_APOC1	0	10	22	26
_APOC1P1	0	0	0	0
_APOC2	0	0	0	0
_APOC3	0	0	0	0
_APOC4	0	0	0	0
_APOD	0	5	0	0
_APOE	12	6	193	204
_APOF	0	0	0	4
_APOH	0	0	0	0
_APOL1	488	453	1541	531
_APOL2	267	354	756	357
_APOL3	146	284	206	57
_APOL4	2	8	8	2
_APOL5	0	0	0	1
_APOL6	216	403	396	176
_APOLD1	12	19	14	23
_APOM	18	10	6	4
_APOO	14	93	12	23
_APOOL	2	47	3	23
_APP	15358	10077	23884	15514
_APPBP2	251	371	459	449
_APPL1	938	2116	2323	1931
_APPL2	795	1393	1364	1092
_APRT	169	246	181	329
_APTX	940	2652	2046	1861
_AQP1	0	5	0	0
_AQP10	0	0	0	0
_AQP11	2	3	5	2
_AQP12A	0	0	0	0
_AQP12B	0	0	0	0
_AQP2	0	0	0	0
_AQP3	31	82	99	0
_AQP4	0	0	0	0
_AQP5	0	0	0	0
_AQP6	0	0	0	0
_AQP7	0	0	0	0
_AQP7P1	0	0	0	0
_AQP7P3	0	0	0	0
_AQP8	0	0	0	0
_AQP9	0	0	6	0
_AQPEP	0	0	0	6
_AQR	550	1607	1389	1165
_AR	0	0	0	0
_ARAF	14	38	47	19
_ARAP1	265	307	971	906
_ARAP2	481	933	1434	797
_ARAP3	53	16	32	12
_ARC	0	0	0	0
_ARCN1	1512	3340	3686	3689
_AREG	6922	22948	10673	12689
_ARF1	2107	3805	4094	3439
_ARF3	551	1017	827	763
_ARF4	2439	6922	7490	6057
_ARF5	891	1166	2343	1896
_ARF6	44	124	120	55
_ARFGAP1	586	858	1084	1180
_ARFGAP2	425	973	657	644
_ARFGAP3	330	664	570	373
_ARFGEF1	1388	2800	3081	2572
_ARFGEF2	386	959	915	824
_ARFIP1	513	1248	799	808
_ARFIP2	189	450	383	391
_ARFRP1	185	252	271	183
_ARG1	0	0	0	0
_ARG2	170	496	478	256
_ARGFX	0	0	0	0
_ARGFXP2	2	8	10	6
_ARGLU1	2931	3711	5036	3406
_ARHGAP1	24	6	48	38
_ARHGAP10	498	695	733	782
_ARHGAP11A	425	843	202	635
_ARHGAP11B	29	56	41	57
_ARHGAP12	1807	3031	3225	2121
_ARHGAP15	0	0	6	0
_ARHGAP17	190	191	199	159
_ARHGAP18	144	809	56	67
_ARHGAP19	59	226	97	141
_ARHGAP20	0	0	0	0
_ARHGAP21	2997	2724	4342	2882
_ARHGAP22	10	38	38	41
_ARHGAP23	113	205	201	111
_ARHGAP24	49	88	545	300
_ARHGAP25	0	65	4	0
_ARHGAP26	68	197	138	42
_ARHGAP27	17	60	48	59
_ARHGAP28	0	0	6	8
_ARHGAP29	2215	5476	6913	6412
_ARHGAP30	14	14	14	16
_ARHGAP31	52	68	23	49
_ARHGAP32	327	437	171	88
_ARHGAP33	0	0	0	0
_ARHGAP36	0	0	0	0
_ARHGAP39	9	26	15	25
_ARHGAP4	33	61	53	24
_ARHGAP40	23	5	12	18
_ARHGAP42	156	190	668	569
_ARHGAP44	0	3	0	0
_ARHGAP5	2628	6011	7768	4173
_ARHGAP6	47	46	18	33
_ARHGAP8	58	108	125	69
_ARHGAP9	0	0	0	0
_ARHGDIA	437	447	571	414
_ARHGDIB	975	2807	708	724
_ARHGDIG	0	0	0	0
_ARHGEF1	333	287	476	707
_ARHGEF10	145	156	242	407
_ARHGEF10L	18	72	69	16
_ARHGEF11	46	78	66	107
_ARHGEF12	2238	3673	5806	5552
_ARHGEF15	0	0	0	0
_ARHGEF16	0	14	0	1
_ARHGEF17	58	29	178	135
_ARHGEF18	429	352	937	502
_ARHGEF19	7	28	16	3
_ARHGEF2	126	592	276	146
_ARHGEF25	0	0	9	9
_ARHGEF26	0	9	17	26
_ARHGEF3	567	713	1380	710
_ARHGEF33	0	0	0	12
_ARHGEF35	526	410	1050	639
_ARHGEF37	3	34	40	27
_ARHGEF38	21	73	33	41
_ARHGEF4	8	30	13	2
_ARHGEF40	260	155	204	135
_ARHGEF5	487	528	1063	664
_ARHGEF6	30	22	77	123
_ARHGEF7	227	332	429	382
_ARHGEF9	0	0	0	0
_ARID1A	221	228	200	224
_ARID1B	211	244	286	223
_ARID2	287	567	735	519
_ARID3A	82	46	154	127
_ARID3B	31	32	66	47
_ARID3C	0	0	0	0
_ARID4A	615	679	1625	1007
_ARID4B	1247	2532	3077	1878
_ARID5A	0	4	10	44
_ARID5B	47	80	82	26
_ARIH1	653	1318	1622	1169
_ARIH2	834	1542	1563	1165
_ARL1	1012	2811	2722	2141
_ARL10	58	79	188	103
_ARL11	0	0	0	1
_ARL13A	0	0	0	2
_ARL13B	341	1068	755	876
_ARL14	7	33	49	31
_ARL15	30	73	79	68
_ARL16	117	441	345	233
_ARL17A	61	89	35	101
_ARL17B	58	84	35	80
_ARL2	115	84	214	144
_ARL2BP	346	773	657	579
_ARL3	228	307	420	319
_ARL4A	126	961	1083	587
_ARL4C	255	313	19	11
_ARL4D	84	94	141	52
_ARL5A	160	581	543	357
_ARL5B	110	384	361	229
_ARL5C	0	4	0	0
_ARL6	47	172	241	182
_ARL6IP1	1238	2893	2614	2820
_ARL6IP4	1888	2322	4058	2572
_ARL6IP5	739	1280	1776	1273
_ARL6IP6	281	1247	702	935
_ARL8A	81	165	236	174
_ARL8B	999	1399	2380	1263
_ARL9	0	0	0	0
_ARMC1	398	1126	736	744
_ARMC10	87	367	434	229
_ARMC2	50	40	61	26
_ARMC3	0	0	0	0
_ARMC4	0	0	0	0
_ARMC5	59	64	78	83
_ARMC6	127	273	180	262
_ARMC7	1	15	16	28
_ARMC8	281	1229	1178	902
_ARMC9	72	73	200	130
_ARMCX1	0	2	0	0
_ARMCX2	54	104	12	6
_ARMCX3	694	759	1977	1087
_ARMCX4	8	50	75	46
_ARMCX5	185	540	377	321
_ARMCX6	242	372	830	424
_ARMS2	0	0	0	0
_ARNT	586	686	1126	726
_ARNT2	9	12	2	2
_ARNTL	752	1618	2207	1147
_ARNTL2	1573	3872	3316	2649
_ARPC1A	300	596	778	747
_ARPC1B	427	983	1241	1267
_ARPC2	3071	5706	5788	4302
_ARPC3	623	952	1153	973
_ARPC4	342	521	825	664
_ARPC4-TTLL3	96	185	343	237
_ARPC5	2067	3866	4634	4067
_ARPC5L	502	1253	995	795
_ARPP19	3248	8751	7557	6815
_ARPP21	0	0	0	0
_ARR3	0	0	0	4
_ARRB1	0	25	5	33
_ARRB2	18	125	130	44
_ARRDC1	249	414	391	267
_ARRDC2	178	110	337	134
_ARRDC3	339	347	795	208
_ARRDC4	149	47	68	81
_ARRDC5	0	0	0	0
_ARSA	47	19	41	67
_ARSB	83	86	49	91
_ARSD	39	45	11	0
_ARSE	0	3	0	0
_ARSF	0	0	0	0
_ARSG	10	28	25	11
_ARSH	0	0	0	0
_ARSI	0	0	13	4
_ARSJ	87	408	133	135
_ARSK	124	241	343	189
_ART1	0	0	0	0
_ART3	0	0	0	0
_ART4	0	0	0	0
_ART5	0	0	0	0
_ARTN	5	25	33	34
_ARV1	68	304	195	209
_ARVCF	5	3	26	9
_ARX	0	0	0	0
_AS3MT	1	1	5	40
_ASAH1	251	949	1299	758
_ASAH2	9	110	106	43
_ASAH2B	17	102	90	40
_ASAP1	342	602	479	302
_ASAP2	2331	2911	4174	3279
_ASAP3	47	28	96	109
_ASB1	121	402	357	205
_ASB10	0	0	0	0
_ASB11	0	0	0	0
_ASB12	0	0	0	0
_ASB13	35	70	82	67
_ASB14	430	801	928	786
_ASB15	0	0	0	0
_ASB16	2	2	0	0
_ASB17	0	0	6	0
_ASB18	0	0	0	0
_ASB2	0	0	0	0
_ASB3	30	127	154	129
_ASB4	0	1	0	0
_ASB5	0	0	0	0
_ASB6	17	42	41	27
_ASB7	123	209	407	251
_ASB8	62	249	213	209
_ASB9	13	8	0	0
_ASB9P1	0	0	0	0
_ASCC1	478	724	940	584
_ASCC2	180	286	215	226
_ASCC3	2110	5026	3579	3665
_ASCL1	0	0	0	0
_ASCL2	0	0	0	0
_ASCL3	0	0	0	0
_ASCL4	0	0	0	0
_ASF1A	274	607	350	273
_ASF1B	18	33	26	32
_ASGR1	0	0	0	0
_ASGR2	0	0	0	0
_ASH1L	603	824	806	753
_ASH2L	255	371	369	414
_ASIP	0	0	4	0
_ASL	78	238	245	180
_ASMT	0	0	0	0
_ASMTL	12	48	50	54
_ASMTL-AS1	0	0	4	34
_ASNA1	53	137	172	117
_ASNS	53	611	313	38
_ASNSD1	835	2594	1488	1779
_ASPA	0	0	0	0
_ASPDH	0	0	1	2
_ASPG	8	0	0	0
_ASPH	12186	37875	21442	18417
_ASPHD1	0	0	0	4
_ASPHD2	6	34	23	26
_ASPM	419	1027	525	1230
_ASPN	7	4	2	17
_ASPRV1	0	0	0	0
_ASPSCR1	6	33	76	19
_ASRGL1	0	0	0	0
_ASS1	146	267	593	340
_ASTE1	59	146	173	152
_ASTL	0	0	0	0
_ASTN1	0	0	0	0
_ASTN2	10	10	14	14
_ASXL1	919	921	1785	1245
_ASXL2	521	860	785	711
_ASXL3	0	0	0	0
_ASZ1	0	0	0	0
_ATAD1	2845	10039	8480	6753
_ATAD2	1621	4151	1394	3560
_ATAD2B	265	467	482	374
_ATAD3A	97	188	122	140
_ATAD3B	57	142	101	173
_ATAD3C	0	3	14	2
_ATAD5	193	674	139	406
_ATAT1	9	10	11	10
_ATCAY	0	0	3	0
_ATE1	74	280	190	145
_ATF1	92	249	226	173
_ATF2	788	1517	1201	1171
_ATF3	683	1293	5979	1939
_ATF4	2446	4434	7354	2486
_ATF5	20	13	71	44
_ATF6	304	814	891	474
_ATF6B	15	31	51	46
_ATF7	240	399	437	309
_ATF7IP	1918	3068	3868	4221
_ATF7IP2	76	372	787	352
_ATG10	6189	13439	17415	12237
_ATG12	874	1127	1856	1093
_ATG13	280	946	1102	687
_ATG14	152	252	677	310
_ATG16L1	428	1382	1276	774
_ATG16L2	23	44	65	101
_ATG2A	40	16	73	42
_ATG2B	137	309	222	279
_ATG3	1664	4335	2820	2755
_ATG4A	56	308	351	419
_ATG4B	262	406	581	685
_ATG4C	85	287	144	124
_ATG4D	8	74	83	90
_ATG5	1036	2283	2742	1918
_ATG7	183	371	352	278
_ATG9A	175	229	407	348
_ATG9B	4	4	0	0
_ATHL1	42	19	41	31
_ATIC	728	1515	817	663
_ATL1	83	133	528	604
_ATL2	493	1667	986	1164
_ATL3	801	1925	3572	2400
_ATM	1469	2842	2934	3626
_ATMIN	1769	2682	4648	2532
_ATN1	20	23	29	33
_ATOH1	0	0	0	0
_ATOH7	0	0	0	0
_ATOH8	2	2	3	0
_ATOX1	162	347	373	170
_ATP10A	0	0	0	0
_ATP10B	0	0	0	0
_ATP10D	254	546	378	321
_ATP11A	69	127	81	152
_ATP11B	614	1647	1743	1615
_ATP11C	320	956	674	619
_ATP12A	0	0	0	4
_ATP13A1	25	52	62	42
_ATP13A2	124	118	210	139
_ATP13A3	3074	7983	7118	4885
_ATP13A4	0	0	0	0
_ATP13A5	0	0	0	0
_ATP1A1	4285	7537	8344	4000
_ATP1A1OS	205	425	401	265
_ATP1A2	0	0	0	0
_ATP1A3	0	0	13	0
_ATP1A4	0	0	0	0
_ATP1B1	1492	2188	2355	867
_ATP1B2	0	0	0	0
_ATP1B3	445	1372	889	843
_ATP1B4	0	0	0	0
_ATP2A1	12	7	1	0
_ATP2A2	1758	3921	5375	3424
_ATP2A3	2	2	0	2
_ATP2B1	1190	4463	962	1392
_ATP2B2	0	0	0	0
_ATP2B3	0	0	0	0
_ATP2B4	979	887	2253	1199
_ATP2C1	2317	5423	6419	5704
_ATP2C2	90	244	59	76
_ATP4A	0	1	0	0
_ATP4B	0	0	0	0
_ATP5A1	3391	8183	6429	5497
_ATP5B	3189	13354	8826	7678
_ATP5C1	984	3776	2784	2761
_ATP5D	83	121	90	81
_ATP5E	592	727	1414	1036
_ATP5EP2	0	0	1	0
_ATP5F1	2264	6729	4709	4086
_ATP5G1	14	195	32	44
_ATP5G2	143	102	300	160
_ATP5G3	599	1517	1173	1151
_ATP5H	5563	13582	10760	9605
_ATP5I	739	2225	1843	1697
_ATP5J	327	816	628	792
_ATP5J2	179	481	747	527
_ATP5J2-PTCD1	36	104	128	77
_ATP5L	1304	2633	5238	3612
_ATP5L2	12	0	0	0
_ATP5O	910	1868	1657	1411
_ATP5S	58	188	259	194
_ATP5SL	131	583	781	797
_ATP6AP1	33	108	150	80
_ATP6AP1L	0	4	15	5
_ATP6AP2	533	854	1140	972
_ATP6V0A1	93	108	254	240
_ATP6V0A2	34	301	203	123
_ATP6V0A4	5	12	10	13
_ATP6V0B	49	427	387	310
_ATP6V0C	55	20	41	57
_ATP6V0D1	495	950	1381	971
_ATP6V0D2	0	0	0	0
_ATP6V0E1	404	1000	1329	870
_ATP6V0E2	0	9	4	0
_ATP6V1A	263	999	785	755
_ATP6V1B1	0	0	0	0
_ATP6V1B2	158	392	186	230
_ATP6V1C1	797	1960	2517	1462
_ATP6V1C2	154	683	684	413
_ATP6V1D	1129	1747	2081	1742
_ATP6V1E1	1525	2997	4090	2378
_ATP6V1E2	51	52	38	12
_ATP6V1F	15	90	138	138
_ATP6V1G1	172	483	516	309
_ATP6V1G2	0	0	0	25
_ATP6V1G3	0	0	0	0
_ATP6V1H	752	1394	1464	1054
_ATP7A	152	202	211	247
_ATP7B	36	43	53	81
_ATP8A1	0	15	4	4
_ATP8A2	10	27	0	0
_ATP8B1	239	676	958	507
_ATP8B2	0	14	0	0
_ATP8B3	0	8	5	4
_ATP8B4	0	0	8	0
_ATP8B5P	0	2	8	10
_ATP9A	174	208	304	218
_ATP9B	129	339	505	216
_ATPAF1	713	2467	2050	1431
_ATPAF2	75	104	255	158
_ATPIF1	2734	5124	5948	4257
_ATR	553	1501	945	959
_ATRIP	32	56	150	46
_ATRN	388	518	1142	790
_ATRNL1	0	0	0	0
_ATRX	1587	2227	2576	2295
_ATXN1	114	156	405	201
_ATXN10	1564	2882	3631	2680
_ATXN1L	41	61	112	75
_ATXN2	97	143	237	191
_ATXN2L	120	231	142	135
_ATXN3	682	893	1652	1039
_ATXN3L	0	0	0	0
_ATXN7	147	240	319	247
_ATXN7L1	26	61	21	57
_ATXN7L2	0	16	2	13
_ATXN7L3	338	588	849	477
_ATXN7L3B	90	211	252	286
_ATXN8OS	0	0	0	0
_AUH	38	68	176	38
_AUP1	450	712	1175	810
_AURKA	708	1609	641	1463
_AURKAIP1	248	409	405	379
_AURKAPS1	15	18	17	21
_AURKB	32	111	63	94
_AURKC	0	3	5	13
_AUTS2	22	22	2	2
_AVEN	203	422	274	248
_AVIL	0	4	4	0
_AVL9	178	373	314	366
_AVP	0	0	0	0
_AVPI1	22	73	172	78
_AVPR1A	0	0	0	0
_AVPR1B	0	0	0	0
_AVPR2	0	0	0	0
_AWAT1	0	0	0	0
_AWAT2	0	0	0	0
_AXIN1	81	100	195	120
_AXIN2	39	0	2	7
_AXL	883	1008	1894	1825
_AZGP1	0	133	27	0
_AZGP1P1	0	0	0	0
_AZI1	11	5	22	51
_AZI2	1715	4266	5280	2759
_AZIN1	1439	3602	4269	3329
_AZU1	0	0	0	0
_B2M	6530	18773	13121	10736
_B3GALNT1	91	672	439	484
_B3GALNT2	162	687	656	402
_B3GALT1	0	0	0	0
_B3GALT2	34	72	120	80
_B3GALT4	3	7	20	10
_B3GALT5	0	4	0	0
_B3GALT6	12	30	27	26
_B3GALTL	35	70	73	102
_B3GAT1	0	0	0	0
_B3GAT2	26	61	86	93
_B3GAT3	23	94	84	564
_B3GNT1	3	8	14	8
_B3GNT2	201	626	400	367
_B3GNT3	8	19	5	4
_B3GNT4	30	41	48	24
_B3GNT5	907	1934	3584	2036
_B3GNT6	0	0	0	0
_B3GNT7	7	0	4	4
_B3GNT8	2	0	8	0
_B3GNT9	20	15	29	18
_B3GNTL1	4	25	22	47
_B4GALNT1	0	2	6	15
_B4GALNT2	0	0	0	0
_B4GALNT3	0	6	0	0
_B4GALNT4	0	6	3	6
_B4GALT1	450	513	497	406
_B4GALT2	54	122	95	61
_B4GALT3	98	136	126	72
_B4GALT4	447	1224	1444	795
_B4GALT5	283	559	814	619
_B4GALT6	19	102	26	35
_B4GALT7	37	76	76	94
_B9D1	0	109	20	2354
_B9D2	6	0	4	17
_BAALC	6	0	0	0
_BAAT	0	0	7	0
_BACE1	156	86	244	255
_BACE2	157	237	321	160
_BACH1	769	1553	1527	774
_BACH2	59	13	144	36
_BAD	22	157	405	267
_BAG1	955	1113	3382	878
_BAG2	150	735	483	285
_BAG3	76	145	616	83
_BAG4	139	296	320	232
_BAG5	1107	3045	2586	2325
_BAG6	296	333	588	354
_BAGE2	7	26	22	28
_BAHD1	40	35	40	39
_BAI1	0	0	0	0
_BAI2	11	18	0	10
_BAI3	0	0	0	0
_BAIAP2	236	242	355	257
_BAIAP2L1	476	853	1236	734
_BAIAP2L2	0	0	0	0
_BAIAP3	24	57	62	44
_BAK1	61	124	113	99
_BAMBI	0	6	8	0
_BANF1	101	299	175	270
_BANF2	0	0	0	0
_BANK1	11	89	30	16
_BANP	78	222	498	158
_BAP1	236	509	483	371
_BARD1	191	551	344	516
_BARHL1	0	1	0	0
_BARHL2	0	0	0	0
_BARX1	0	0	0	0
_BARX2	0	0	0	0
_BASP1	231	190	282	232
_BASP1P1	0	0	0	0
_BATF	67	83	149	45
_BATF2	3	3	15	11
_BATF3	0	5	0	0
_BAX	609	1185	1503	1851
_BAZ1A	1819	3010	3256	1694
_BAZ1B	964	1643	1196	1117
_BAZ2A	862	926	1479	1037
_BAZ2B	1073	831	1543	1735
_BBC3	39	55	59	56
_BBIP1	283	769	644	485
_BBOX1	20	8	7	65
_BBS1	54	29	233	249
_BBS10	61	115	199	129
_BBS12	25	39	151	52
_BBS2	986	987	1220	1320
_BBS4	387	371	465	549
_BBS5	54	105	146	172
_BBS7	238	576	721	676
_BBS9	129	204	376	356
_BBX	1688	2239	2390	2033
_BCAM	0	0	6	4
_BCAN	0	2	0	0
_BCAP29	3375	10513	6663	7122
_BCAP31	1272	1300	1884	1077
_BCAR1	83	198	371	115
_BCAR3	188	378	441	387
_BCAR4	0	0	0	0
_BCAS1	0	0	39	0
_BCAS2	1082	3348	3289	1825
_BCAS3	42	56	119	107
_BCAS4	24	21	50	77
_BCAT1	0	3	0	0
_BCAT2	45	82	220	80
_BCCIP	1072	3830	1873	1594
_BCDIN3D	4	32	25	19
_BCHE	0	37	339	275
_BCKDHA	26	26	109	160
_BCKDHB	43	163	139	121
_BCKDK	21	50	32	44
_BCL10	102	276	461	201
_BCL11A	8	12	11	12
_BCL11B	19	25	25	13
_BCL2	6	6	0	1
_BCL2A1	0	16	6	0
_BCL2L1	2097	3657	2818	1448
_BCL2L10	0	7	16	6
_BCL2L11	10	24	94	107
_BCL2L12	39	162	168	312
_BCL2L13	1359	3203	4394	2248
_BCL2L14	13	27	75	16
_BCL2L15	0	0	0	0
_BCL2L2	93	187	181	108
_BCL2L2-PABPN1	614	844	1326	800
_BCL3	0	3	2	11
_BCL6	18	4	78	4
_BCL6B	0	0	0	0
_BCL7A	12	44	67	27
_BCL7B	166	721	566	302
_BCL7C	77	103	243	168
_BCL9	7	13	16	2
_BCL9L	35	36	58	57
_BCLAF1	2664	4939	4189	3555
_BCMO1	0	0	0	0
_BCO2	0	33	98	48
_BCOR	74	119	161	184
_BCORL1	2	4	33	21
_BCORP1	0	0	0	0
_BCR	329	396	314	368
_BCRP2	6	6	8	2
_BCRP3	4	10	4	20
_BCS1L	159	838	370	251
_BCYRN1	6	8	6	6
_BDH1	49	53	57	98
_BDH2	118	236	202	242
_BDKRB1	0	0	3	4
_BDKRB2	160	455	119	42
_BDNF	4	60	233	50
_BDP1	1189	2233	1497	1727
_BEAN1	0	0	0	0
_BECN1	904	1738	1752	1334
_BEGAIN	0	2	0	4
_BEND2	0	0	0	0
_BEND3	34	47	92	59
_BEND4	0	0	0	0
_BEND5	0	0	0	0
_BEND6	55	40	210	51
_BEND7	6	29	127	75
_BEST1	4102	8120	16652	4905
_BEST2	0	0	6	0
_BEST3	0	3	0	0
_BEST4	0	0	0	0
_BET1	47	268	188	189
_BET1L	64	238	180	159
_BEX1	0	0	0	0
_BEX2	0	34	37	13
_BEX4	0	0	0	0
_BEX5	0	0	6	8
_BFAR	786	2058	2386	1384
_BFSP1	8	16	3	15
_BFSP2	0	0	0	0
_BGLAP	0	0	3	0
_BGN	0	6	0	0
_BHLHA15	0	0	0	0
_BHLHA9	0	0	0	0
_BHLHB9	12	146	199	93
_BHLHE22	0	0	0	0
_BHLHE23	0	0	0	0
_BHLHE40	309	255	470	440
_BHLHE41	4	117	141	25
_BHMT	0	0	0	0
_BHMT2	0	0	0	0
_BICC1	0	0	0	0
_BICD1	73	90	158	160
_BICD2	149	193	219	141
_BID	323	677	545	208
_BIK	27	46	91	29
_BIN1	74	160	66	61
_BIN2	0	0	3	2
_BIN3	115	131	104	161
_BIRC2	1279	2937	3687	3453
_BIRC3	1254	4213	4735	4696
_BIRC5	881	3436	1423	2107
_BIRC6	1233	2654	2610	2403
_BIRC7	0	0	0	0
_BIRC8	0	0	0	0
_BIVM	366	1002	729	750
_BLCAP	456	660	980	688
_BLID	3	7	0	3
_BLK	1	1	0	0
_BLM	175	689	51	307
_BLMH	335	751	410	408
_BLNK	0	0	0	0
_BLOC1S1	483	711	807	797
_BLOC1S2	674	1324	1334	1414
_BLOC1S3	0	1	7	10
_BLVRA	214	330	479	501
_BLVRB	94	43	334	152
_BLZF1	185	656	482	514
_BMF	21	2	34	10
_BMI1	1282	2556	2925	2016
_BMP1	207	222	303	161
_BMP10	0	0	0	0
_BMP15	0	0	0	0
_BMP2	67	105	394	51
_BMP2K	216	460	394	444
_BMP3	0	0	0	0
_BMP4	12	15	5	0
_BMP5	0	0	0	0
_BMP6	11	2	3	0
_BMP7	0	1	0	0
_BMP8A	0	0	0	0
_BMP8B	0	2	0	0
_BMPER	0	0	0	0
_BMPR1A	183	538	867	763
_BMPR1B	24	109	118	95
_BMPR2	737	716	1183	1319
_BMS1	237	690	375	371
_BMS1P1	48	149	128	89
_BMS1P4	34	60	21	38
_BMS1P5	37	119	105	68
_BMX	0	1	0	0
_BNC1	3	1	2	0
_BNC2	11	43	6	11
_BNIP1	15	90	43	36
_BNIP2	2253	4058	4259	3336
_BNIP3	0	1	1	0
_BNIP3L	359	276	697	722
_BNIPL	2	9	8	0
_BOC	16	0	0	8
_BOD1	563	1697	1718	822
_BOK	21	16	79	43
_BOLA1	10	15	58	17
_BOLA2	57	193	107	125
_BOLA2B	110	365	135	193
_BOLA3	272	2195	736	940
_BOLL	0	0	0	0
_BOP1	278	723	395	409
_BPESC1	0	0	0	0
_BPGM	351	544	476	293
_BPHL	64	104	172	73
_BPI	0	0	0	0
_BPNT1	287	802	674	718
_BPTF	654	945	1134	1122
_BPY2B	0	0	0	0
_BPY2C	0	0	0	0
_BRAF	108	263	283	267
_BRAP	214	327	383	261
_BRCA1	1104	4273	467	1884
_BRCA2	231	738	108	411
_BRCC3	409	1084	941	749
_BRD1	129	156	191	176
_BRD2	375	1022	1630	736
_BRD3	63	71	109	114
_BRD4	55	97	66	48
_BRD7	1355	2950	2191	2219
_BRD7P3	0	3	0	1
_BRD8	1479	1854	3041	2472
_BRD9	225	238	222	233
_BRDT	0	0	0	0
_BRE	218	199	234	203
_BRF1	209	166	386	285
_BRF2	3	39	93	10
_BRI3	168	465	392	258
_BRI3BP	89	289	70	127
_BRIP1	280	574	503	823
_BRIX1	755	5273	1656	1488
_BRMS1	159	460	890	578
_BRMS1L	343	1013	911	1057
_BROX	215	259	322	414
_BRPF1	38	85	99	53
_BRPF3	53	93	95	76
_BRS3	0	0	0	1
_BRSK1	3	4	68	46
_BRSK2	0	0	0	1
_BRWD1	1240	1607	3162	2535
_BRWD3	564	1052	1715	1059
_BSCL2	142	434	273	1920
_BSDC1	301	421	1090	840
_BSG	1139	2016	2970	2221
_BSN	0	2	2	3
_BSND	0	0	0	0
_BSPH1	0	0	0	0
_BSPRY	0	4	1	9
_BST1	5	0	0	0
_BST2	3	20	0	3
_BSX	0	0	0	0
_BTAF1	344	716	741	584
_BTBD1	743	1491	1527	1389
_BTBD10	1405	2102	2203	1643
_BTBD11	11	31	0	0
_BTBD16	0	0	0	0
_BTBD17	0	0	0	0
_BTBD18	0	0	10	0
_BTBD19	9	4	14	2
_BTBD2	59	59	134	112
_BTBD3	552	563	904	459
_BTBD6	133	246	250	131
_BTBD7	597	940	1076	819
_BTBD8	29	66	89	30
_BTBD9	23	39	41	53
_BTC	0	65	14	32
_BTD	145	203	287	191
_BTF3	12345	26196	32189	16957
_BTF3L4	1528	5486	3623	2257
_BTF3P11	0	0	0	0
_BTG1	216	184	818	224
_BTG2	39	65	152	63
_BTG3	139	310	576	311
_BTG4	0	0	1	2
_BTK	0	0	8	0
_BTLA	0	0	0	0
_BTN1A1	0	0	0	0
_BTN2A1	268	503	866	501
_BTN2A2	36	96	90	86
_BTN3A1	210	156	286	135
_BTN3A2	217	410	407	235
_BTN3A3	135	258	315	106
_BTNL2	0	0	0	0
_BTNL3	0	0	0	0
_BTNL8	0	0	0	0
_BTNL9	0	0	0	0
_BTRC	388	659	890	688
_BUB1	215	641	206	385
_BUB1B	529	1376	401	1164
_BUB3	629	1949	1215	1310
_BUD13	133	407	560	375
_BUD31	2767	7475	12009	7549
_BVES	11	8	1	0
_BYSL	94	200	133	89
_BZRAP1	0	9	6	9
_BZW1	7197	23948	14315	12657
_BZW2	464	1362	1272	686
_C10orf10	22	16	23	8
_C10orf105	0	0	0	2
_C10orf107	0	0	0	0
_C10orf11	0	0	0	0
_C10orf111	0	0	0	0
_C10orf113	36	12	36	48
_C10orf118	1261	2559	4341	3014
_C10orf12	175	306	272	273
_C10orf120	0	0	0	0
_C10orf128	0	15	0	0
_C10orf129	4	1	7	2
_C10orf131	0	0	0	0
_C10orf137	139	343	278	201
_C10orf2	56	171	142	106
_C10orf25	5	1	17	10
_C10orf32	47	221	123	189
_C10orf35	0	2	4	15
_C10orf40	0	0	0	0
_C10orf53	0	0	0	0
_C10orf54	32	17	113	25
_C10orf55	56	77	22	42
_C10orf62	0	0	0	0
_C10orf67	0	0	1	1
_C10orf68	81	22	86	9
_C10orf71	0	0	0	0
_C10orf76	92	164	295	206
_C10orf82	0	0	0	0
_C10orf88	13	91	114	108
_C10orf90	0	0	0	0
_C10orf91	0	4	0	0
_C10orf95	0	0	0	0
_C10orf99	0	0	4	0
_C11orf1	80	78	132	84
_C11orf16	0	0	0	3
_C11orf21	0	0	0	0
_C11orf24	25	38	44	35
_C11orf30	49	132	133	189
_C11orf31	243	605	571	393
_C11orf34	0	0	0	0
_C11orf35	4	0	1	3
_C11orf40	0	0	0	0
_C11orf42	0	0	0	0
_C11orf45	12	10	9	17
_C11orf48	1529	4711	3004	4873
_C11orf49	76	179	160	340
_C11orf52	0	4	23	2
_C11orf53	0	0	0	0
_C11orf54	165	299	887	597
_C11orf57	1643	2823	5979	3089
_C11orf58	4117	11143	8391	7491
_C11orf63	42	73	228	95
_C11orf65	43	124	107	123
_C11orf68	48	112	41	72
_C11orf70	0	8	38	15
_C11orf71	2	0	3	4
_C11orf73	119	323	385	304
_C11orf74	80	291	450	455
_C11orf80	59	61	364	332
_C11orf82	60	408	160	305
_C11orf83	59	76	92	250
_C11orf84	2	8	39	61
_C11orf85	0	0	0	0
_C11orf86	0	0	0	0
_C11orf87	0	1	0	0
_C11orf88	0	0	3	0
_C11orf91	205	346	296	767
_C11orf92	0	0	0	0
_C11orf93	0	0	0	0
_C11orf94	0	0	0	0
_C11orf95	28	27	70	57
_C11orf96	9	0	3	0
_C12orf10	106	129	166	99
_C12orf23	363	660	750	665
_C12orf29	381	1347	842	648
_C12orf36	0	14	0	0
_C12orf39	0	24	0	0
_C12orf4	557	1723	937	1041
_C12orf40	1	3	2	6
_C12orf42	0	0	0	0
_C12orf43	286	236	205	200
_C12orf44	37	173	151	63
_C12orf45	89	276	146	112
_C12orf49	103	145	331	82
_C12orf5	178	674	671	672
_C12orf50	0	4	0	0
_C12orf52	27	81	91	75
_C12orf54	8	0	42	14
_C12orf56	0	0	0	0
_C12orf57	87	286	236	392
_C12orf60	9	7	4	10
_C12orf61	1	1	2	4
_C12orf65	193	269	512	395
_C12orf66	33	33	29	29
_C12orf68	0	0	0	0
_C12orf71	12	0	0	0
_C12orf73	194	683	496	611
_C12orf74	0	0	0	0
_C12orf75	581	1010	640	840
_C12orf76	99	222	288	203
_C12orf77	0	0	0	0
_C13orf35	0	0	0	0
_C14orf1	45	105	125	150
_C14orf105	0	0	0	0
_C14orf119	66	93	80	70
_C14orf132	1	0	0	0
_C14orf142	26	68	171	65
_C14orf159	154	432	148	174
_C14orf166	507	1919	1782	1472
_C14orf166B	0	0	0	0
_C14orf169	6	9	4	6
_C14orf177	0	0	0	0
_C14orf178	0	0	16	0
_C14orf180	0	0	0	0
_C14orf182	0	8	16	6
_C14orf183	0	0	0	0
_C14orf2	593	1402	1710	1690
_C14orf23	24	35	48	24
_C14orf28	23	36	92	103
_C14orf37	12	26	27	76
_C14orf39	2	4	6	0
_C14orf64	0	0	0	6
_C14orf79	21	61	24	32
_C14orf80	1	27	17	23
_C14orf93	92	166	158	47
_C15orf26	0	0	0	0
_C15orf27	15	38	23	31
_C15orf32	0	0	0	0
_C15orf37	5	4	5	3
_C15orf38	31	67	81	75
_C15orf38-AP3S2	144	260	284	223
_C15orf39	0	29	0	36
_C15orf40	197	515	546	649
_C15orf41	1	33	12	37
_C15orf43	0	0	0	0
_C15orf48	220	100	248	331
_C15orf52	286	163	150	88
_C15orf53	0	0	0	0
_C15orf54	1	8	0	2
_C15orf56	2	0	0	0
_C15orf57	29	167	151	99
_C15orf59	0	0	0	0
_C15orf60	0	0	0	4
_C15orf61	9	9	36	21
_C15orf62	4	12	24	5
_C16orf11	0	0	0	0
_C16orf13	113	138	122	77
_C16orf3	1	21	16	4
_C16orf45	188	84	88	65
_C16orf46	0	5	20	22
_C16orf52	49	65	89	32
_C16orf54	8	0	0	0
_C16orf58	68	119	138	117
_C16orf59	0	29	5	3
_C16orf62	256	452	264	347
_C16orf70	95	140	200	155
_C16orf71	0	0	0	0
_C16orf72	227	465	454	252
_C16orf74	22	38	98	55
_C16orf78	0	0	0	0
_C16orf80	233	756	578	516
_C16orf82	0	0	0	0
_C16orf86	0	0	0	0
_C16orf87	6	87	82	18
_C16orf89	0	0	0	0
_C16orf90	0	0	0	0
_C16orf91	37	38	41	31
_C16orf92	0	0	0	0
_C16orf93	6	20	85	23
_C17orf100	0	3	3	1
_C17orf102	0	0	0	0
_C17orf103	2	2	31	8
_C17orf104	48	143	134	108
_C17orf105	0	3	0	0
_C17orf107	1	0	3	2
_C17orf47	0	0	0	0
_C17orf49	160	398	614	510
_C17orf50	0	0	0	0
_C17orf51	10	53	3	0
_C17orf53	22	69	6	24
_C17orf58	52	174	227	246
_C17orf59	17	2	28	17
_C17orf62	58	129	193	223
_C17orf64	0	0	0	0
_C17orf66	0	0	0	0
_C17orf67	5	4	33	4
_C17orf70	16	43	20	25
_C17orf72	5	49	9	6
_C17orf74	0	0	0	0
_C17orf75	266	962	631	744
_C17orf77	0	0	0	0
_C17orf78	0	0	0	1
_C17orf80	411	612	711	353
_C17orf82	0	0	0	0
_C17orf85	883	1583	1519	1303
_C17orf89	43	161	34	33
_C17orf96	0	5	1	9
_C17orf97	0	0	10	16
_C17orf98	0	0	0	0
_C17orf99	0	0	3	0
_C18orf21	64	198	188	72
_C18orf25	673	1067	1925	1283
_C18orf32	502	1351	1159	903
_C18orf54	85	294	64	171
_C18orf56	5	13	4	1
_C18orf8	147	375	353	305
_C19orf10	242	499	522	511
_C19orf12	52	111	303	234
_C19orf18	0	0	3	9
_C19orf24	60	53	83	45
_C19orf25	29	38	196	180
_C19orf26	4	1	6	5
_C19orf33	258	426	1061	1407
_C19orf35	1	3	0	4
_C19orf38	0	0	0	0
_C19orf40	0	17	25	70
_C19orf43	570	756	957	773
_C19orf44	12	41	15	15
_C19orf45	0	0	0	0
_C19orf47	25	28	84	106
_C19orf48	75	245	247	322
_C19orf52	10	6	21	12
_C19orf53	2394	5914	3242	3432
_C19orf54	17	9	13	24
_C19orf55	20	3	25	89
_C19orf57	3	2	1	0
_C19orf59	0	0	0	0
_C19orf60	8	19	51	42
_C19orf66	147	87	347	96
_C19orf69	0	0	0	0
_C19orf70	19	54	109	65
_C19orf71	0	3	19	3
_C19orf73	0	0	3	0
_C19orf77	0	0	6	0
_C1D	838	2097	2104	1273
_C1GALT1	1868	4926	1190	946
_C1GALT1C1	402	783	445	745
_C1orf100	0	3	0	0
_C1orf101	1	3	21	0
_C1orf105	0	0	0	0
_C1orf106	96	161	128	109
_C1orf109	42	184	110	124
_C1orf110	8	0	4	2
_C1orf111	0	2	2	0
_C1orf112	118	602	165	346
_C1orf115	4	13	38	32
_C1orf116	169	317	568	221
_C1orf122	8	48	80	67
_C1orf123	221	508	480	325
_C1orf127	0	0	0	0
_C1orf131	148	382	187	103
_C1orf141	0	0	0	0
_C1orf146	0	0	0	0
_C1orf158	0	0	0	0
_C1orf159	0	10	13	21
_C1orf162	0	0	0	0
_C1orf168	0	0	0	0
_C1orf170	0	0	0	3
_C1orf172	10	22	26	35
_C1orf173	0	0	0	0
_C1orf174	10	43	34	48
_C1orf177	0	0	0	0
_C1orf180	0	0	0	0
_C1orf185	0	0	0	0
_C1orf186	0	0	0	0
_C1orf189	0	3	0	0
_C1orf192	7	18	4	11
_C1orf194	0	9	0	0
_C1orf198	47	133	131	99
_C1orf200	0	0	0	0
_C1orf204	4	0	0	0
_C1orf21	120	151	84	79
_C1orf210	0	2	4	6
_C1orf213	0	0	6	1
_C1orf216	93	107	117	87
_C1orf220	0	2	1	0
_C1orf226	9	7	28	11
_C1orf227	0	0	0	0
_C1orf228	45	0	2	0
_C1orf229	0	0	0	0
_C1orf27	255	581	669	373
_C1orf35	62	59	84	52
_C1orf43	507	1688	2200	1191
_C1orf50	13	28	33	20
_C1orf51	17	27	87	43
_C1orf52	641	1453	1502	1285
_C1orf53	0	0	23	4
_C1orf54	2	21	14	12
_C1orf56	99	89	140	105
_C1orf61	0	0	0	0
_C1orf63	544	558	1660	911
_C1orf64	0	0	0	0
_C1orf65	0	0	0	0
_C1orf68	0	0	0	0
_C1orf74	24	41	56	50
_C1orf85	24	15	52	69
_C1orf86	20	36	43	26
_C1orf87	0	0	0	0
_C1orf94	0	0	0	0
_C1orf95	0	0	0	0
_C1QA	0	0	0	0
_C1QB	0	0	0	0
_C1QBP	1747	9550	3542	2727
_C1QC	0	0	0	0
_C1QL1	0	0	0	0
_C1QL2	0	0	0	0
_C1QL3	2	22	9	12
_C1QL4	0	0	0	0
_C1QTNF1	51	36	20	11
_C1QTNF2	0	0	3	1
_C1QTNF3	44	68	54	45
_C1QTNF4	0	0	0	0
_C1QTNF5	0	0	0	0
_C1QTNF6	49	74	73	32
_C1QTNF7	0	0	0	0
_C1QTNF8	0	0	0	0
_C1QTNF9	0	0	0	0
_C1QTNF9B	24	0	6	0
_C1R	117	10	314	62
_C1RL	131	55	160	79
_C1S	268	123	451	121
_C2	0	0	3	0
_C20orf112	45	20	16	17
_C20orf141	0	0	0	0
_C20orf144	2	1	1	23
_C20orf166	0	0	0	0
_C20orf173	0	0	0	0
_C20orf194	164	165	357	372
_C20orf195	0	0	0	0
_C20orf196	21	40	40	22
_C20orf197	14	24	0	5
_C20orf201	0	0	0	0
_C20orf202	0	0	0	0
_C20orf203	0	0	0	0
_C20orf24	185	689	700	282
_C20orf26	0	0	0	0
_C20orf27	36	35	42	58
_C20orf85	0	0	0	0
_C20orf96	0	7	42	26
_C21orf119	1	4	1	5
_C21orf128	0	0	0	0
_C21orf2	1	7	5	17
_C21orf33	59	83	128	98
_C21orf37	0	0	0	0
_C21orf49	0	0	0	2
_C21orf54	0	0	0	0
_C21orf58	24	18	6	25
_C21orf59	753	2272	1852	1409
_C21orf62	0	0	1	0
_C21orf67	0	0	0	0
_C21orf88	0	0	0	0
_C21orf90	0	0	0	0
_C21orf91	57	105	415	196
_C22orf15	0	0	4	0
_C22orf23	21	16	73	12
_C22orf24	4	16	6	2
_C22orf26	3	3	3	15
_C22orf29	51	75	126	59
_C22orf31	0	0	0	0
_C22orf34	0	0	0	0
_C22orf39	93	210	182	138
_C22orf42	0	0	0	0
_C22orf43	1	5	2	0
[truncated: 16,561 more rows]
