# Supplementary material for: Barrett’s Epithelium to Esophageal Adenocarcinoma: Is There a “Point of No Return”?
Source: Front Genet. 2021 Sep 17;12:706706. doi: 10.3389/fgene.2021.706706 (PMC8485939; doi:10.3389/fgene.2021.706706)
Supplement: Supplementary Table 2 — List of primers used for confirmatory qPCRs. [file Table_2.XLSX]

## Sheet: stab2
Primer	Sequence
AGR2-F	ATGAGTGCCCACACAGTCAA
AGR2-R	GGACATACTGGCCATCAGGA
APOE-F	GGGTCGCTTTTGGGATTACCTG
APOE-R	CAACTCCTTCATGGTCTCGTCC
BRCA1-F	CTTAGAGTGTCCCATCTGTCTGG
BRCA1-R	GCCCTTTCTTCTGGTTGAGA
CAPN1-F	GGTGGAGTTCAACATCCTGTGG
CAPN1-R	ATCCGCATCTCGTAGGCACTCA
CCND1-F	TCTACACCGACAACTCCATCCG
CCND1-R	TCTGGCATTTTGGAGAGGAAGTG
CLDN1-F	CCTATGACCCCAGTCAATGC
CLDN1-R	TCCCAGAAGGCAGAGAGAAG
DKK1-F	CAACGCTATCAAGAACCTGC
DKK1-R	GATCTTGGACCAGAAGTGTC
FN1-F	TGACCCCTACACAGTTTCCCA
FN1-R	TGATTCAGACATTCGTTCCCAC
FOS-F	AAAAGGAGAATCCGAAGGGAAA
FOS-R	GTCTGTCTCCGCTTGGAGTGTAT
GJA1-F	TCTGAGTGCCTGAACTTGC
GJA1-R	ACTGACAGCCACACCTTCC
HES1-F	GGAAATGACAGTGAAGCACCTCC
HES1-R	GAAGCGGGTCACCTCGTTCATG
ID2-F	TCAGCCTGCATCACCAGAGA
ID2-R	CTGCAAGGACAGGATGCTGATA
IL8-F	TGCCAAGGAGTGCTAAAG
IL8-R	CTCCACAACCCTCTGCAC
MCAM-F	TGGTTTGTACACCTTGCAGAGTATTC
MCAM-R	TGGGCAGCCGGTAGTTGA
MKI67-F	CCCTGATGAGAAAGCTCAAGAT
MKI67-R	CAGCATGTTCTGAGGAATGAAC
SEMA3A-F	ACACCAGAAGAGATGAATGC
SEMA3A-R	GCGTACAAGTGAGTCTGATT
SERPINE1-F	AGTGGACTTTTCAGAGGTGGA
SERPINE1-R	GCCGTTGAAGTAGAGGGCATT
TAGLN-F	TCCAGAACTGGCTCAAGGATGG
TAGLN-R	TCTGCTCCATCTGCTTGAAGGC
TGFBR2-F	GTCTGTGGATGACCTGGCTAAC
TGFBR2-R	GACATCGGTCTGCTTGAAGGAC
TNFSF10-F	TGGCAACTCCGTCAGCTCGTTA
TNFSF10-R	AGCTGCTACTCTCTGAGGACCT
VEGFA-F	ATCTTCAAGCCATCCTGTGTGC
VEGFA-R	GCTCACCGCCTCGGCTTGT
ZEB1-F	AGCAGTGAAAGAGAAGGGAATGC
ZEB1-R	GGTCCTCTTCAGGTGCCTCAG
