# Supplementary material for: Barrett’s Epithelium to Esophageal Adenocarcinoma: Is There a “Point of No Return”?
Source: Front Genet. 2021 Sep 17;12:706706. doi: 10.3389/fgene.2021.706706 (PMC8485939; doi:10.3389/fgene.2021.706706)
Supplement: Supplementary Table 3 — List of genes in LLHH and HHLL categories. [file Table_3.XLSX]

## Sheet: stab3
Symbol	class		Symbol	class
ACSF2	LLHH		ABCA10	HHLL
ACTG1	LLHH		ABCC3	HHLL
ACTN4	LLHH		ABLIM1	HHLL
ADAM22	LLHH		ABLIM3	HHLL
ADM	LLHH		ACSL5	HHLL
AKT3	LLHH		ADAM19	HHLL
ALKBH6	LLHH		ADAMTS9	HHLL
APBB1	LLHH		AGPAT9	HHLL
APOE	LLHH		AIMP2	HHLL
ARAP1	LLHH		AKR1B1	HHLL
ARHGAP24	LLHH		ALDH3A1	HHLL
ATF3	LLHH		AMN1	HHLL
ATF7IP2	LLHH		ANO1	HHLL
ATL1	LLHH		ANTXR2	HHLL
ATP5SL	LLHH		ANXA10	HHLL
BAD	LLHH		ANXA6	HHLL
BBS1	LLHH		AOX1	HHLL
BCHE	LLHH		ARHGAP18	HHLL
C11orf80	LLHH		ARHGAP32	HHLL
C19orf33	LLHH		ARHGDIB	HHLL
CADPS2	LLHH		ARL4C	HHLL
CAPN1	LLHH		ATP2B1	HHLL
CAPN12	LLHH		BDKRB2	HHLL
CARD8	LLHH		C1GALT1	HHLL
CCDC80	LLHH		C6orf223	HHLL
CDH10	LLHH		CA12	HHLL
CEBPG	LLHH		CALB1	HHLL
CFI	LLHH		CBX5	HHLL
CFLAR	LLHH		CCND1	HHLL
CNTNAP4	LLHH		CDC25B	HHLL
COL5A2	LLHH		CDC7	HHLL
CPE	LLHH		CLCA2	HHLL
CTSF	LLHH		COL16A1	HHLL
CYBRD1	LLHH		COL5A1	HHLL
CYP2U1	LLHH		COTL1	HHLL
CYTH2	LLHH		DARS2	HHLL
DAB2IP	LLHH		DAZ1	HHLL
DBNDD2	LLHH		DAZ2	HHLL
DHRS3	LLHH		DAZ3	HHLL
DKK1	LLHH		DAZ4	HHLL
DMKN	LLHH		DCBLD2	HHLL
DNAJB12	LLHH		DDX3Y	HHLL
EDN1	LLHH		DHRS2	HHLL
EFEMP1	LLHH		DHRS9	HHLL
EPHA3	LLHH		DOCK10	HHLL
ERBB3	LLHH		DPYSL3	HHLL
FAP	LLHH		DTL	HHLL
FBXO25	LLHH		DUSP6	HHLL
FGD4	LLHH		E2F7	HHLL
FKBP1B	LLHH		EIF1AY	HHLL
FXYD3	LLHH		EPB41L2	HHLL
GABARAPL1	LLHH		EVI2A	HHLL
GADD45A	LLHH		EVI2B	HHLL
GADD45B	LLHH		EXOSC8	HHLL
GBP1	LLHH		FEZ1	HHLL
GCA	LLHH		FGFBP1	HHLL
GLT8D2	LLHH		FGFR1	HHLL
GYS1	LLHH		FOXM1	HHLL
H1F0	LLHH		FSCN1	HHLL
HES1	LLHH		FSIP2	HHLL
HINFP	LLHH		FST	HHLL
HKR1	LLHH		FUT8	HHLL
HOOK1	LLHH		GALC	HHLL
HOXA5	LLHH		GDA	HHLL
HSPB1	LLHH		GFPT2	HHLL
IFFO2	LLHH		GINS2	HHLL
IFT46	LLHH		GJB2	HHLL
IKZF2	LLHH		GNG2	HHLL
IL18	LLHH		GPR110	HHLL
IL2RG	LLHH		GPR176	HHLL
ING4	LLHH		GPR56	HHLL
IP6K2	LLHH		GRB10	HHLL
ITPKC	LLHH		GSDMB	HHLL
JUP	LLHH		HDAC9	HHLL
KCTD11	LLHH		HIST1H2AD	HHLL
KDELC2	LLHH		HIST1H2AJ	HHLL
KIAA0513	LLHH		HIST1H2AL	HHLL
KLC3	LLHH		HMGA2	HHLL
KRT17	LLHH		HMGB1	HHLL
KRT81	LLHH		HTR7	HHLL
KRT86	LLHH		IL1B	HHLL
LAMA1	LLHH		IL7R	HHLL
LCP1	LLHH		IL8	HHLL
LIMCH1	LLHH		ITGA2	HHLL
LOX	LLHH		KCNJ15	HHLL
LRP11	LLHH		KIAA0754	HHLL
LRRC6	LLHH		LARS	HHLL
LRRK2	LLHH		LETM2	HHLL
MAGED1	LLHH		LPXN	HHLL
MATN2	LLHH		LY6K	HHLL
MBD3	LLHH		MAP1B	HHLL
MCAM	LLHH		MGLL	HHLL
MED17	LLHH		MICAL2	HHLL
METTL7A	LLHH		MIOS	HHLL
MSRB3	LLHH		MMP1	HHLL
NADSYN1	LLHH		MYEOV	HHLL
NAPA	LLHH		MYLK	HHLL
NAT1	LLHH		NAA11	HHLL
NOSTRIN	LLHH		NAMPT	HHLL
NRCAM	LLHH		NAV3	HHLL
NUCB1	LLHH		NCAPD3	HHLL
PARD6G	LLHH		NCEH1	HHLL
PDE10A	LLHH		NFE2L3	HHLL
PLEKHA1	LLHH		NLRP3	HHLL
PM20D2	LLHH		NRP1	HHLL
PROS1	LLHH		NRP2	HHLL
PTPLB	LLHH		OAS2	HHLL
PTPN20A	LLHH		PDE4D	HHLL
RBM42	LLHH		PHLDA1	HHLL
RDX	LLHH		PLAT	HHLL
RNF103	LLHH		PLAU	HHLL
RNF152	LLHH		PLCE1	HHLL
RNF217	LLHH		PMS2	HHLL
ROBO1	LLHH		PODXL	HHLL
RPL13A	LLHH		POSTN	HHLL
RPL13AP20	LLHH		PPP2R2C	HHLL
SEPW1	LLHH		PRIM1	HHLL
SERPINH1	LLHH		PRIM2	HHLL
SERTAD1	LLHH		PRMT3	HHLL
SGK1	LLHH		PSMD2	HHLL
SLC16A4	LLHH		PTX3	HHLL
SLC38A5	LLHH		RAB31	HHLL
SLC44A5	LLHH		RAD18	HHLL
SLFN11	LLHH		RANBP1	HHLL
SLITRK1	LLHH		RFC4	HHLL
SMEK3P	LLHH		RFC5	HHLL
SNCG	LLHH		RNF216	HHLL
SORT1	LLHH		RPA3	HHLL
STX5	LLHH		RPS4Y1	HHLL
SYBU	LLHH		RPS6KA2	HHLL
SYS1-DBNDD2	LLHH		SCG5	HHLL
TAF7	LLHH		SEMA3A	HHLL
TAGLN	LLHH		SEMA5A	HHLL
TBCB	LLHH		SERPINA1	HHLL
TCP11L2	LLHH		SERPINB4	HHLL
TMC4	LLHH		SERPINE2	HHLL
TMEM138	LLHH		SH3KBP1	HHLL
TMEM25	LLHH		SLC20A1	HHLL
TRAM1	LLHH		SLC29A1	HHLL
TRIM28	LLHH		SLC2A3	HHLL
TRIML2	LLHH		SLC6A6	HHLL
UBE2E2	LLHH		SLC8A1	HHLL
UBL3	LLHH		SLFN5	HHLL
VGLL3	LLHH		SPOCK1	HHLL
WISP3	LLHH		SPTLC3	HHLL
YIF1B	LLHH		SRGN	HHLL
ZNF17	LLHH		STAMBPL1	HHLL
ZNF28	LLHH		STEAP1	HHLL
ZNF285	LLHH		SULF2	HHLL
ZNF350	LLHH		TGFBR2	HHLL
ZNF419	LLHH		TGM2	HHLL
ZNF420	LLHH		THBS1	HHLL
ZNF431	LLHH		THY1	HHLL
ZNF461	LLHH		TIAM1	HHLL
ZNF493	LLHH		TLR4	HHLL
ZNF506	LLHH		TMEM156	HHLL
ZNF559	LLHH		TNIP3	HHLL
ZNF571	LLHH		TSC22D1	HHLL
ZNF585A	LLHH		TTC8	HHLL
ZNF585B	LLHH		UHRF1	HHLL
ZNF615	LLHH		USP9Y	HHLL
ZNF655	LLHH		UTY	HHLL
ZNF708	LLHH		VCAN	HHLL
ZNF714	LLHH		VEGFA	HHLL
ZNF738	LLHH		VEPH1	HHLL
ZNF823	LLHH		WDHD1	HHLL
			XAF1	HHLL
			XDH	HHLL
			ZEB1	HHLL
			ZFY	HHLL
			ZNF462	HHLL
